# Supplementary material for: Tunable Lattice Coupling of Multipole Plasmon Modes and Near-Field Enhancement in Closely Spaced Gold Nanorod Arrays
Source: PubMed Central journal article supplement (PMC4794719; doi:10.1038/srep23159), 2016-03-17
Supplement: srep23159-s1.pdf [file srep23159-s1.pdf]

Supplementary Information for:

## **Tunable Lattice Coupling of Multipole Plasmon Modes and Near-Field Enhancement in Closely Spaced Gold Nanorod Arrays**

Yu Huang<sup>1,\*</sup>, Xian Zhang<sup>1,\*</sup>, Emilie Ringe<sup>2</sup>, Mengjing Hou<sup>1</sup>, Lingwei Ma<sup>1</sup> & Zhengjun Zhang<sup>3</sup>

<sup>1</sup>State Key Laboratory of New Ceramics and Fine Processing, School of Materials Science and Engineering, Tsinghua University, Beijing 100084, P. R. China.

<sup>2</sup>Department of Materials Science and Nanoengineering & Laboratory for Nanophotonics, Rice University, 6100 Main Street, Houston, TX 77005, USA.

<sup>3</sup>Key Laboratory of Advanced Materials (MOE), School of Materials Science and Engineering, Tsinghua University, Beijing 100084, P. R. China.

\*These authors contributed equally to this work. Correspondence and requests for materials should be addressed to Z.J.Z. (email: zjzhang@tsinghua.edu.cn).

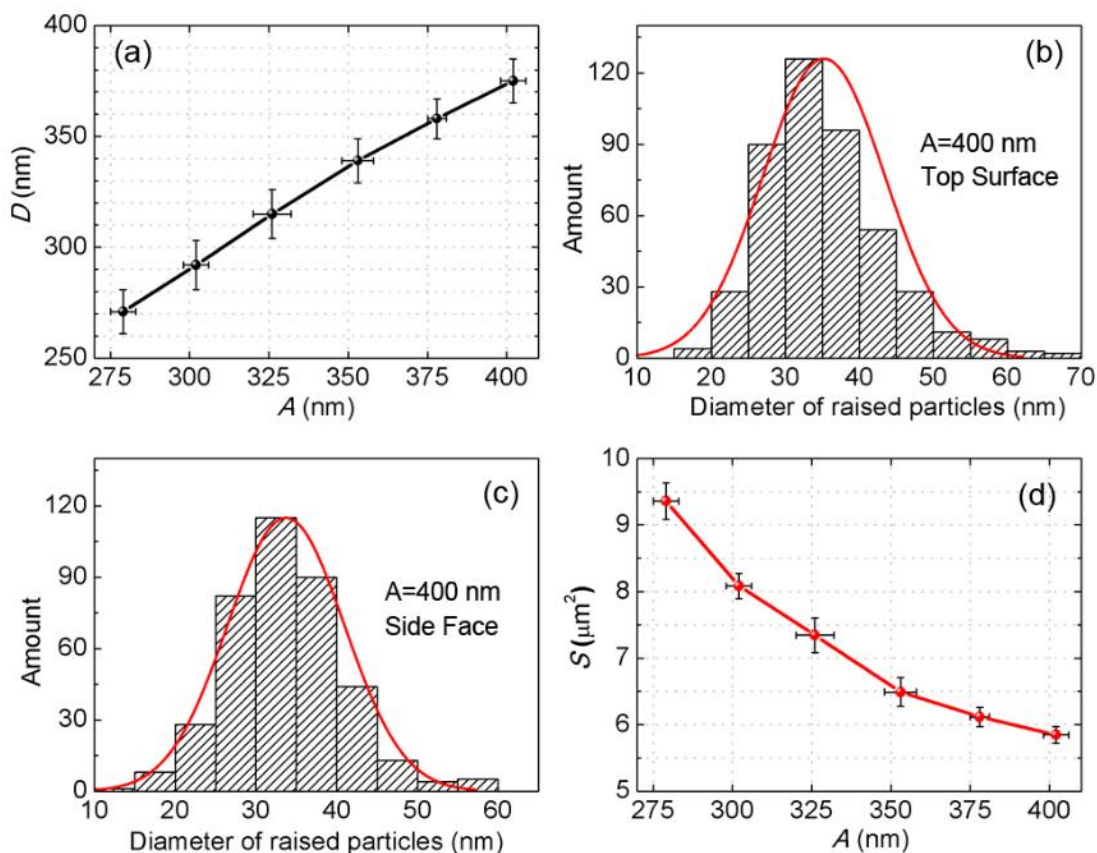

**Supplementary Figure S1 | Sizes of fabricated gold nanorod arrays.** (a) Diameter  $D$  of the nanorod in fabricated arrays.  $A$  is the pre-set array periodicity. Error bars are the standard deviations. (b,c) Distributions of the diameter of raised particles on the top surface and side face in array  $A = 400$  nm. (d) Estimations of the total surface area of the nanorods on  $1 \times 1 \mu\text{m}^2$ . Error bars are respectively uncertainties of total surface area  $S$  and standard deviations of  $A$ .

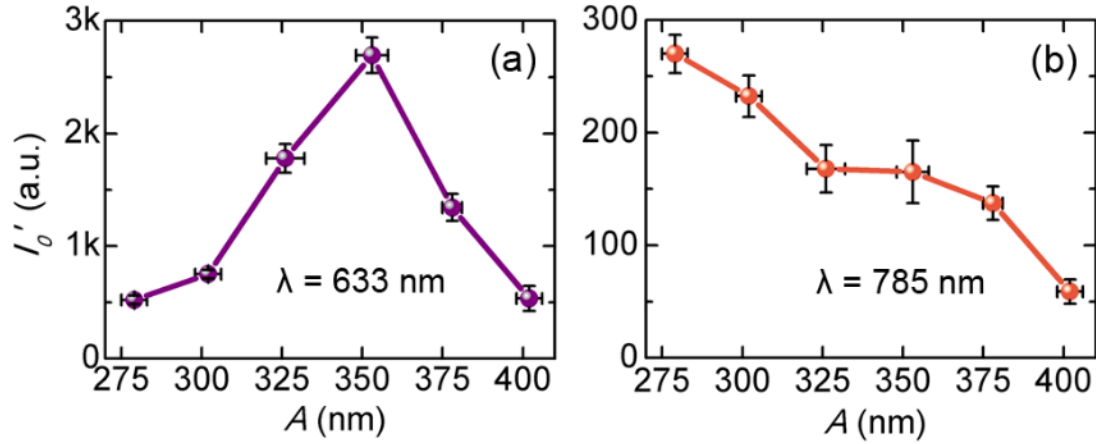

**Supplementary Figure S2 | Average SERS intensity  $I_0'$  of  $612\text{ cm}^{-1}$  band. (a) 633 nm excitation. (b) 785 nm excitation. Error bars are the standard deviations.**

**Supplementary Movie S1 | Three dimensional surface charge distributions within one oscillation for Fig. 1e: array  $h = 300$  nm,  $D = 300$  nm,  $d = 10$  nm,  $\lambda = 675$  nm, the lattice coupling of six-pole plasmon modes.**
